# Supplementary material
Source: PubMed Central journal article supplement (PMC3943892)
Supplement: NIHMS550544-supplement-01.pdf [file NIHMS550544-supplement-01.pdf]

**SUPPLEMENTAL INFORMATION**

**Table S1, related to Figure 3.** Sequence alignment of the starting enzyme and 31 cloned individuals obtained after the 10th round of in vitro evolution.

|     | 5'       | 10             | 20            | 30              | 40            | 50                   | 3' |
|-----|----------|----------------|---------------|-----------------|---------------|----------------------|----|
| wt  | GGAAGUUG | <u>UGCUCG</u>  | <u>AUUGUU</u> | ACGUAAGUAACAG   | <u>UUUGAA</u> | <u>UGGGUUGAAGUUU</u> |    |
| 37* |          | UA . AC        |               | C . G           |               |                      |    |
| 10  |          | UA . AC        |               | C . G           |               |                      |    |
| 18  |          | UA . AC        |               | C . G           |               |                      |    |
| 34  |          | UA . AC        |               | C . G           |               | -                    |    |
| 35  |          | UA . AC        |               | C . G           |               | -                    |    |
| 3   |          | UA . AC        |               | C . A . G       |               | -                    |    |
| 4   |          | UA . AC        |               | C . A . G       |               | -                    |    |
| 8   |          | UA . AC        |               | C . A . G       |               | -                    |    |
| 11  |          | UA . AC        |               | U . G           |               |                      |    |
| 16  |          | UA . AC        |               | U . G           |               |                      |    |
| 19  |          | UA . AC        |               | U . C . G       |               |                      |    |
| 45  |          | UA . AC        |               | - U . G         |               |                      |    |
| 12  |          | UA . AC        |               | G . U . G       |               |                      |    |
| 13  |          | UA . AC . A    |               | U . G . C       |               |                      |    |
| 21  |          | UA . AC . A    |               | U . U . A . G   |               | -                    |    |
| 2   |          | UA . A . G     |               | A . G           |               | -                    |    |
| 41  |          | UA . A . G     |               | A . G           |               | -                    |    |
| 25  |          | UA . A . G     |               | A . G           |               |                      |    |
| 48  |          | UA . A         |               | - A . G         |               | -                    |    |
| 22  |          | UA . A . C     | -             | - - - - A . G   |               | -                    |    |
| 9   |          | UA . A         |               | - C . G         |               |                      |    |
| 28  |          | UA . A         |               | G . - C . G     |               | -                    |    |
| 30  |          | UA . . A       |               | - A . G         |               | -                    |    |
| 29  |          | UA . . A       |               | - A . G         |               | - C                  |    |
| 39  |          | UA . . A       |               | A . - A . G     |               | -                    |    |
| 40  | . G .    | A . A . G      |               | - A . G         |               | -                    |    |
| 23  | . - .    | A . A . G      |               | A . C - A . G   |               | CC .                 |    |
| 1   |          | AU . A . U . C |               | G . C . G . G   |               | -                    |    |
| 46  |          | A . A . U . C  |               | C . G . GC . GG |               |                      |    |
| 26  | . G .    | A . A . U      |               | A . U . G . GC  |               | -                    |    |
| 15  |          | A . A . U -    |               | C . GC          |               | -                    |    |

Sequence of the wild-type enzyme (E1) is shown, with underlined nucleotides indicating positions that were mutagenized in the starting population. Clone numbers are indicated at the left. Clone 37 (asterisk) corresponds to the F1 enzyme. 48 clones were obtained, of which 31 were sequenced.

**Figure S1, related to Figure 2.** Self-replication activity of individual clones obtained after the 6th (white), 8th (gray), and 10th (black) rounds of in vitro evolution. The activity of the E1 enzyme (wt) and of the population as a whole after rounds 6 and 8 are indicated by dashed lines. Reaction conditions:  $1 \mu\text{M}$  each substrate,  $25 \text{ mM MgCl}_2$ , pH 8.5,  $42 \text{ }^\circ\text{C}$ .

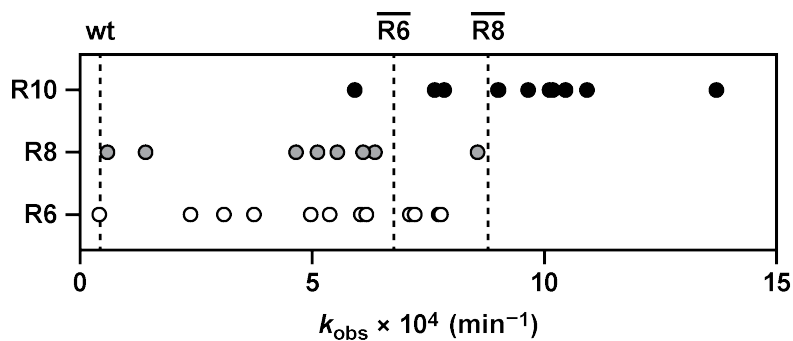

**Figure S2, related to Figure 4.** Temperature dependence of the replicating E1 and F1 enzymes. Both the exponential growth rate (left axis) and doubling time (right axis) are indicated. Self-replication of F1 (green) employed  $10 \mu\text{M}$  of each substrate. Cross-replication of F1 (blue) and F1' (red) and of E1 (black) and E1' (white) employed  $5 \mu\text{M}$  of each substrate. Reaction conditions:  $0.05 \mu\text{M}$  starting enzyme,  $25 \text{ mM MgCl}_2$ , pH 8.5.

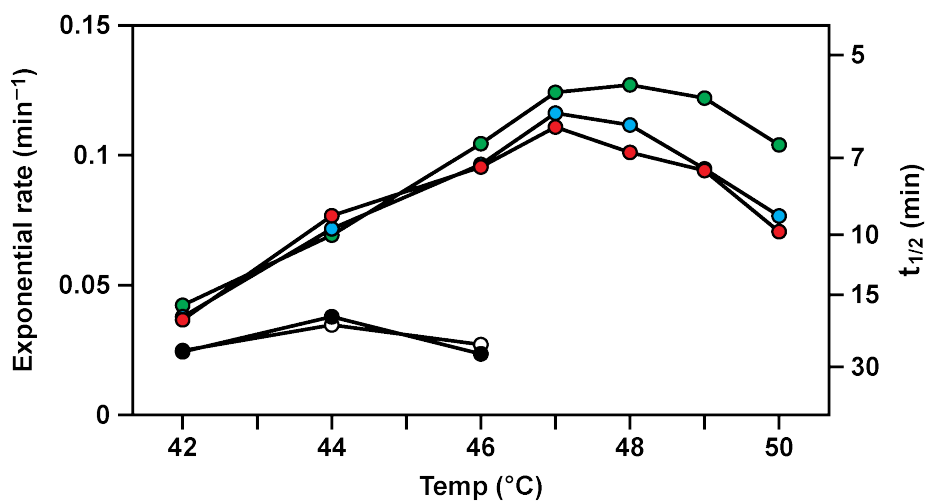

**Figure S3, related to Figure 5.** Substrate concentration dependence of the replicating E1 and F1 enzymes. Both the exponential growth rate (left axis) and doubling time (right axis) are indicated. Self-replication of E1 (gray) and F1 (black) were carried out at 44 and 48 °C, respectively. Reaction conditions: 0.05  $\mu\text{M}$  starting enzyme, 25 mM  $\text{MgCl}_2$ , pH 8.5, 42 °C.

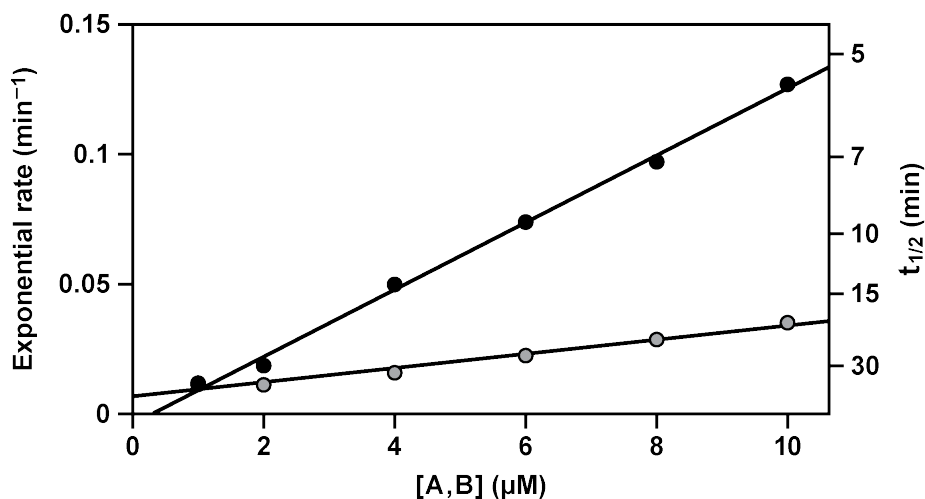

**Figure S4, related to Figure 6.** Catalytic activity of the cross-replicating F1 (black) and F1' (gray) enzymes in the component ligation reactions, conducted under enzyme-excess, single-turnover conditions. Values for  $k_{\text{obs}}$  were obtained for various concentrations of enzyme based on the initial rate of reaction, then fit to the Michaelis–Menten equation:  $k_{\text{obs}} = k_{\text{cat}}[\text{E}] / (K_{\text{m}} + [\text{E}])$ . Reaction conditions:  $\leq 3$  nM A (or A'), 100  $\mu\text{M}$  B (or B'), 25 mM  $\text{MgCl}_2$ , pH 8.5, 42 °C.

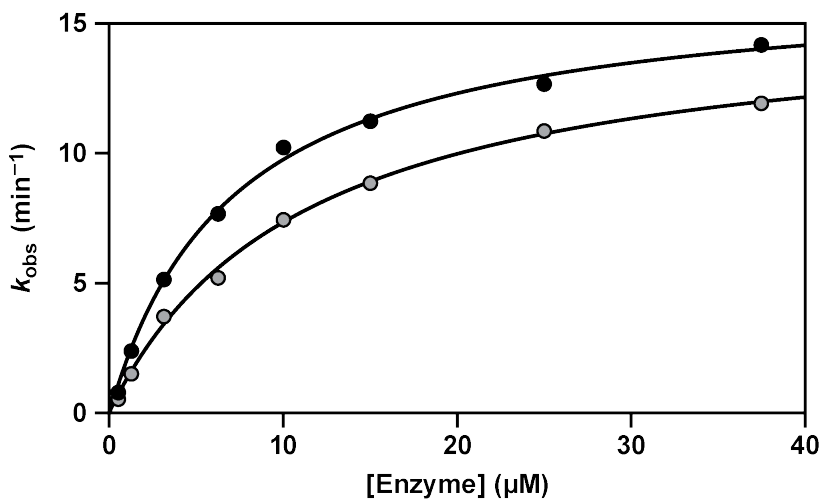

**Table S2, related to Figure 1.** Sequences of synthetic oligonucleotides used in this study.

| Description                                                                            | Sequence (5'→3')                                                                                                  |
|----------------------------------------------------------------------------------------|-------------------------------------------------------------------------------------------------------------------|
| Library of DNA templates                                                               | GGCTAATACGACTCACTATAGAGACCGCAACTTGAGAAA-GTTGTGCTCGATTGTTACGTAAGTAACAGTTTGAATGGGT-TGAAGTTTGAGACCCTCGTGATGTCCAGTCGC |
| Primer for 2nd-strand synthesis for A-format reactions                                 | GCGACTGGACATCACGAG                                                                                                |
| Guide RNA for M1 cleavage                                                              | GGAGUAAGUUGCGGUCACCAUC                                                                                            |
| Substrate for A-format reactions                                                       | biotin-d(ATCGCTTGATCGCT)-r(GGUUGAAGAAU)                                                                           |
| 1st half-template for substrate for B-format reactions                                 | GGCTAATACGACTCACTATTGAGACCGCAACTTA•GCCC-GGACTCGGGTTCCAGTACTA                                                      |
| 2nd half-template for substrate for B-format reactions                                 | GTGGTGCCCGACTCGGTAGTACTGGAAC                                                                                      |
| Substrate for B-format reactions                                                       | GAGACCGCAACUUA-biotin                                                                                             |
| Primer for 2nd-strand synthesis for B-format reactions                                 | TAAGTTGCGGTCTC                                                                                                    |
| Forward 1st PCR primer for A-format                                                    | ATCGCTTGATCGCTGGTTGAAGAAT                                                                                         |
| Reverse PCR primer for A-format <sup>a</sup>                                           | GCGACTGGACATCACGAGGGTCTCAAAC                                                                                      |
| Forward 2nd PCR primer for A-format                                                    | GGCTAATACGACTCACTATAGAGACCGCAACTTGAG                                                                              |
| Forward PCR primer for B-format <sup>b</sup>                                           | GGCTAATACGACTCACTATAGGAGCGAGAAAGTTG                                                                               |
| Reverse PCR primer for B-format                                                        | TAAGTTGCGGTCTC•ATTCTTCAACCTTCCGGTCTCAAAC                                                                          |
| Forward PCR primer for converting B-format to A-format                                 | GGCTAATACGACTCACTATAGAGACCGCAACTTGAGAAA-GTTG                                                                      |
| Reverse 1st PCR primer for converting A-format to self-replication format              | GAATATTTCATGCGGTCTCAAA                                                                                            |
| Forward 2nd PCR primer for converting A-format to self-replication format              | GGCTAATACGACTCACTATA                                                                                              |
| Reverse 2nd PCR primer for converting A-format to self-replication format <sup>c</sup> | TAAGTTGCGGTCTCATACT                                                                                               |

<sup>a</sup> Also used as reverse PCR primer for converting B-format to A-format.

<sup>b</sup> Also used as forward 1st PCR primer for converting A-format to self-replication format and as forward PCR primer for converting B-format to self-replication format.

<sup>c</sup> Also used as reverse PCR primer for converting B-format to self-replication format.

T7 RNA polymerase promoter sequence in red; mutagenized nucleotides underlined; region of hybridization in blue; dot indicates corresponding site for cleavage by M1 RNA; nucleotides in italics were not present in the reverse PCR primer during the first four rounds of in vitro evolution.
